# Supplementary material for: The Replacement of Fish Meal With Poultry By-Product Meal and Insect Exuviae: Effects on Growth Performance, Gut Health and Microbiota of the European Seabass, <em>Dicentrarchus labrax</em>
Source: Preprints.org preprint supplement (doi:10.20944/preprints202403.0257.v1), 2024-03-05
Supplement: Supplementary file 3 [file supplementary]

## Sheet: Foglio1
Data file S1. Number of reads per each taxa found in intestinal and feed samples
TAXONOMY	CTRL 1	CTRL 2	CTRL 3	CTRL 4	CTRL 5	CTRL 6	CTRL 7	PM20-1	PM20-2	PM20-3	PM20-4	PM20-5	PM20-6	PM25-1	PM25-2	PM25-3	PM25-4	PM25-5	PM25-6	PM25-7	A-1	A-2	A-3	B-1	B-2	B-3	C-1	C-2	C-3
uncultured	371	304	444	65	173	527	173	225	216	855	13	593	95	669	1434	235	293	284	2600	3572	415	72	104	1392	1178	1231	48	64	157
Actinomyces	195	60	0	51	14	22	29	71	6	195	0	25	12	2	101	0	0	158	267	4	19	30	80	511	440	394	673	620	768
Corynebacterium	1275	1156	279	467	269	559	612	301	428	1307	255	466	116	94	205	43	151	729	1655	1713	321	212	667	1513	1352	1286	126	48	147
Brevibacterium	406	6	4	6	0	0	0	26	17	55	0	105	27	0	0	7	0	0	0	0	35	57	101	696	555	646	13	8	30
Leucobacter	184	7	0	2	2	8	0	6	27	63	0	0	17	0	0	0	0	0	0	0	11	11	20	154	166	157	26	22	17
Kocuria	517	24	0	0	2	0	0	18	0	0	0	31	0	0	0	0	17	71	0	0	0	2	0	0	0	0	0	2	0
Chloroplast
Aneurinibacillus	11	802	317	112	103	319	416	14	155	362	0	69	20	3	122	0	0	123	55	271	147	20	29	6	9	8	20	14	28
Unknown Planococcaceae	61	133	47	34	28	0	167	0	12	237	108	90	2	0	0	17	0	0	0	0	46	100	81	353	367	395	8	18	26
Lysinibacillus	97	5	0	4	0	42	0	56	0	0	0	0	0	0	0	0	0	0	0	0	0	0	21	0	0	0	0	2	4
Savagea	700	621	59	64	0	232	66	139	49	577	219	301	46	0	0	0	0	0	0	53	110	301	376	931	1015	956	37	41	29
Sporosarcina	40	203	67	11	28	76	140	19	228	81	0	63	23	0	0	0	0	0	93	26	58	86	137	238	276	308	561	559	615
Lactobacillus	46197	17759	4052	3895	5546	18221	16315	148	154	1190	378	334	92	278	2962	44	13	0	2534	2978	4878	11026	16327	6359	6026	6042	7957	7962	8503
Streptococcus	1644	52	53	13	16	47	2	0	0	79	0	0	0	56	0	18	15	634	266	83	87	155	162	125	111	94	164	139	189
Paenibacillus	2305	14660	4767	1651	1894	7435	18716	2361	8986	13324	1669	6327	1838	6	136	2	21	0	89	244	9107	395	1009	2406	1113	1589	111	44	977
Nosocomiicoccus	408	19	0	0	0	8	0	7	0	0	0	0	0	0	0	0	0	0	0	0	4	9	26	43	45	61	0	0	0
Staphylococcus	5737	27859	44791	62895	27909	14357	12343	309	673	2746	2499	769	322	2816	3561	506	10046	550	1321	34217	692	155	341	2306	1808	1904	34	2	79
Unknown Clostridiaceae	128	3429	1790	786	1582	4600	3544	0	29	19	0	11	9	31	226	16	44	98	240	157	7	5	78	0	0	0	0	0	4
Veillonella	75	0	0	0	0	0	0	0	0	0	0	25	0	0	0	0	0	0	25	0	4	0	0	0	0	0	3	0	0
Leptotrichia	856	0	0	0	0	0	0	0	0	0	0	0	0	0	0	0	0	0	45	0	0	0	0	0	0	0	0	0	0
Bradyrhizobium	123	0	16	0	0	0	0	0	0	14	0	0	1	0	0	0	8	0	0	0	0	0	0	0	0	0	0	0	0
Mitochondria	1034	559	129	334	211	333	856	0	2	329	0	22	30	41	145	0	40	0	32	64	6109	11706	12362	9979	9576	9551	11233	12435	15584
Escherichia-Shigella	885	27	0	0	0	0	0	0	0	0	0	0	0	0	0	0	0	0	0	0	0	0	13	20	0	0	19	1	20
Photobacterium	1468	2132	2214	4786	13988	2152	10748	45953	74967	40794	32972	70965	42067	5685	99362	14186	80238	12059	55469	9470	11078	724	690	255	325	511	649	517	1893
Vibrio	56	438	659	1372	28147	6762	34	67810	26066	36408	50074	55575	69245	99586	16300	66322	31878	33809	4400	39626	2448	15	22	15	54	101	17	14	339
Blastocatella	0	0	0	0	14	61	0	126	69	0	69	0	0	71	36	12	86	0	0	65	36	0	0	0	0	0	0	0	0
Ilumatobacter	0	0	0	0	0	3	2	0	14	0	0	18	4	14	0	14	2	0	0	0	0	0	3	0	0	0	0	0	0
Lawsonella	0	26	62	24	31	19	12	7	27	119	21	8	18	29	226	27	0	80	221	114	23	4	41	0	0	9	10	6	24
Dietzia	0	5	0	15	0	53	0	15	35	126	3	7	9	0	0	0	0	0	0	0	19	9	18	301	233	208	0	0	15
Mycobacterium	0	921	283	324	229	746	1314	18	46	151	0	83	11	50	395	41	61	213	342	3536	46	0	5	6	0	4	6	0	19
Gordonia	0	39	43	11	50	160	0	0	18	70	0	61	0	32	92	23	35	0	27	288	3	2	0	2	0	0	2	0	4
Rhodococcus	0	0	0	0	0	0	0	0	12	0	0	5	0	0	40	0	0	0	8	0	4	0	2	9	2	1	6	4	8
Blastococcus	0	37	0	0	0	0	0	0	14	0	0	0	0	0	0	0	0	0	0	0	0	0	0	0	0	0	0	0	0
Unknown Beutenbergiaceae	0	0	0	0	0	0	0	0	5	105	0	22	14	0	52	0	0	0	208	6	2	9	6	77	77	73	177	122	154
Brachybacterium	0	54	0	3	0	31	0	0	4	40	33	19	12	0	0	15	0	0	0	0	26	27	57	624	483	506	22	8	23
Unknown Microbacteriaceae	0	11	0	0	5	13	135	0	18	96	0	30	8	13	93	0	0	0	0	0	9	16	26	168	160	162	22	20	28
Cutibacterium	0	104	6	4	45	108	72	18	91	127	8	64	16	82	349	73	123	28	656	697	56	2	13	12	18	11	26	3	20
Unknown Saprospiraceae	0	40	133	10	75	38	0	21	39	389	2	234	16	82	158	28	0	0	257	294	245	2	2	0	6	0	2	4	40
Lewinella	0	0	0	6	17	49	0	9	19	28	0	0	5	0	43	0	0	0	0	0	5	0	0	0	0	0	6	0	0
Taeseokella	0	63	5	41	79	76	0	20	68	360	0	42	0	363	478	104	115	7	204	863	66	0	4	0	0	11	3	0	26
Salinirepens	0	0	0	0	0	0	0	0	10	0	0	0	0	0	0	0	0	0	0	0	0	0	0	0	0	0	0	0	0
Unknown Flavobacteriaceae	0	24	22	29	26	98	233	19	85	109	54	119	0	168	277	107	109	0	1275	322	46	0	4	0	0	0	1	2	2
Aequorivita	0	0	0	0	3	0	17	0	12	0	0	36	0	5	14	0	0	0	0	0	0	0	0	11	28	22	10	10	0
Arenibacter	0	0	0	0	5	0	0	0	3	0	0	0	0	6	7	0	0	0	0	0	0	2	0	0	0	0	0	0	4
Cellulophaga	0	24	14	23	46	128	0	3	91	35	0	52	10	49	274	36	56	0	145	353	56	0	3	0	0	0	5	0	17
Gramella	0	0	0	12	25	12	113	5	6	133	0	0	0	9	47	2	0	0	30	62	0	0	2	0	0	0	0	0	11
Maribacter	0	80	34	51	80	321	287	124	425	629	0	109	28	376	1222	150	169	0	195	1230	162	3	7	8	5	18	14	10	47
Myroides	0	0	0	0	0	0	0	0	52	66	0	39	0	0	0	0	0	0	0	0	438	123	294	1641	1329	1377	11	29	33
Ulvibacter	0	90	148	14	98	138	96	0	61	0	0	15	9	44	36	8	0	0	137	0	3	5	3	157	150	120	19	33	3
Chryseobacterium	0	16	0	0	0	33	0	78	3	0	0	0	0	0	0	28	0	0	0	165	19	7	14	10	19	10	3	37	5
Cloacibacterium	0	0	0	0	11	3	0	337	11	54	0	18	0	0	139	9	2	0	0	0	2	2	5	0	0	0	0	0	2
Empedobacter	0	60	0	0	12	34	0	4	61	120	0	4	7	0	0	17	40	0	0	157	6	0	0	5	2	4	6	0	2
Moheibacter	0	0	0	4	23	35	0	0	37	21	109	20	6	0	0	27	0	0	2	138	5	0	0	7	14	14	2	2	0
Rhodothermaceae	0	3	71	4	10	0	0	0	6	0	0	73	0	64	143	15	87	93	0	136	20	0	0	0	0	8	0	0	0
Obscuribacteraceae	0	9	0	0	0	0	90	0	8	0	0	0	0	0	0	8	0	0	0	82	0	0	0	0	0	0	0	0	0
Truepera	0	42	46	22	3	63	0	0	13	158	0	164	0	101	0	32	9	0	364	405	51	4	2	10	0	0	0	0	21
Bradymonadales	0	0	0	0	2	0	0	0	2	11	0	2	0	1	19	0	0	0	0	0	2	0	0	0	0	0	0	0	0
Unknown Bacillaceae	0	217	34	16	43	54	0	7	61	129	0	56	33	0	46	0	0	0	0	0	42	115	161	1137	929	1135	9	17	25
Anoxybacillus	0	0	0	0	0	0	0	2	8	0	0	5	0	17	0	0	0	0	0	0	0	1	2	0	0	0	0	0	0
Bacillaceae	0	20	0	0	0	0	0	0	12	0	0	0	0	0	0	0	0	0	0	0	0	0	0	2	0	0	0	0	0
Bacillus	0	2005	858	435	321	568	737	189	296	518	0	216	58	25	706	5	72	0	1227	774	358	180	332	812	671	852	4107	5337	5687
Cerasibacillus	0	227	4	16	34	27	87	11	25	0	0	82	12	0	0	0	0	0	0	0	28	58	45	51	46	54	18	12	21
Oceanobacillus	0	546	169	70	47	287	261	40	31	135	0	43	20	0	0	0	0	0	28	0	34	17	66	86	102	80	19	19	20
Pseudogracilibacillus	0	413	50	32	46	67	121	88	46	244	85	108	26	0	3	0	0	0	0	0	132	141	219	1181	945	919	145	219	226
Ureibacillus	0	83	34	2	0	53	277	0	4	0	0	13	0	41	748	6	21	0	738	2006	30	54	66	77	43	89	2321	2996	2898
Virgibacillus	0	16	20	4	0	9	0	0	17	8	0	5	0	0	0	0	0	0	0	0	16	26	41	97	74	83	27	28	41
Marinococcus	0	47	0	2	8	47	0	0	26	0	0	0	0	117	102	42	6	0	0	70	0	2	3	0	0	0	2	0	11
Atopostipes	0	54	0	6	13	59	0	88	70	70	0	68	0	12	94	33	22	0	38	578	34	46	72	118	139	142	20	12	17
Enterococcus	0	33	6	12	46	26	38	12	19	0	0	72	0	0	99	0	0	0	26	21	16	16	43	221	225	256	35	27	33
Mycoplasma	0	0	0	0	0	0	120	0	184	0	0	601	102	775	847	0	12	1124	3333	2426	83	0	0	0	4	16	0	0	2
Unknown Paenibacillaceae	0	42	0	7	0	0	0	0	18	0	0	13	0	0	0	0	0	0	0	0	8	0	4	18	13	15	0	0	0
RsaHf231	0	0	0	0	0	0	0	0	7	0	0	6	8	0	0	0	0	0	0	56	5	0	4	55	60	60	18	12	12
Kroppenstedtia	0	337	34	43	48	53	0	7	47	120	0	48	8	13	141	0	0	26	438	525	117	0	25	5	11	20	9	11	35
Clostridium_sensu_stricto_1	0	494	391	199	218	582	994	45	17	0	370	0	4	6	44	0	11	135	0	131	46	5	3	0	3	2	14	0	2
Clostridium_sensu_stricto_18	0	648	201	56	85	220	324	7	36	18	0	11	17	0	65	11	0	0	0	177	42	10	33	3	7	8	0	4	11
Clostridium_sensu_stricto_7	0	1802	730	272	264	1721	1889	0	15	0	0	33	0	24	101	0	0	0	1165	711	23	25	93	0	0	0	7	9	11
Clostridioides	0	337	24	30	8	0	53	30	25	10	0	52	10	0	0	0	0	0	0	0	40	10	7	95	87	94	6	0	0
Peptostreptococcus	0	69	20	11	4	58	575	0	8	0	0	0	0	0	57	0	0	0	0	0	0	16	21	0	4	6	5	8	11
Anaerosalibacter	0	2088	586	442	224	1555	947	10	6	86	0	0	4	6	126	16	8	0	279	0	68	26	111	10	22	32	3	3	21
Peptostreptococcales-Tissierellales	0	0	8	0	12	3	0	0	11	0	0	2	0	0	0	0	0	0	0	0	14	2	0	0	0	0	0	0	0
Sedimentibacter	0	36	0	0	0	0	0	0	35	4	0	0	0	0	10	0	6	0	254	0	5	2	0	44	36	38	23	19	33
Cetobacterium	0	1565	971	1256	836	2010	1235	0	19	0	0	0	0	6	0	6	31	260	0	25	17	31	51	30	17	19	27	30	30
Nannocystaceae	0	0	0	0	3	0	0	0	12	0	0	8	0	0	0	0	0	0	0	0	5	0	0	0	0	0	0	0	0
Sandaracinus	0	0	0	0	0	0	0	0	7	25	0	31	0	32	25	0	0	0	0	0	2	0	0	0	0	0	2	0	4
Candidatus_Peregrinibacteria	0	49	28	0	42	0	0	23	48	0	0	61	0	75	0	0	22	0	0	252	0	0	0	0	0	0	3	0	0
JGI_0000069-P22	0	0	0	7	14	27	92	0	34	0	238	0	5	30	6	12	0	0	74	599	32	0	0	0	0	0	0	0	0
028H05-P-BN-P5	0	0	0	0	0	6	0	0	7	32	0	0	0	0	0	3	0	0	0	6	8	0	0	0	0	0	2	0	0
Blastopirellula	0	26	12	8	0	0	0	0	10	82	0	114	0	127	152	10	12	0	0	336	53	0	0	2	2	2	5	0	19
Bythopirellula	0	21	0	0	0	0	0	0	42	0	0	0	0	16	0	0	0	0	0	16	0	0	0	0	0	0	0	0	0
Fuerstia	0	0	0	0	0	39	0	63	28	0	0	0	0	10	200	53	83	0	0	49	2	0	0	0	0	0	0	0	0
Hellea	0	0	0	0	0	0	0	0	22	0	0	0	0	0	0	0	0	0	0	0	14	0	0	0	0	0	0	0	6
Robiginitomaculum	0	7	16	4	23	0	80	11	10	18	418	28	0	42	80	15	19	0	42	0	15	0	2	0	0	6	0	0	12
SWB02	0	0	18	0	0	0	0	0	4	0	0	0	8	15	35	0	3	0	0	0	0	0	0	0	0	0	0	0	0
Maritalea	0	10	36	4	19	223	0	4	65	309	0	209	0	99	94	53	67	0	236	515	168	0	0	0	4	12	0	0	60
Unknown Rhizobiaceae	0	195	84	36	32	33	150	141	185	697	41	145	38	163	229	50	86	0	196	1229	188	0	0	4	15	8	2	2	42
Labrenzia	0	0	0	0	0	0	0	0	71	0	0	0	0	0	0	0	0	0	0	0	0	0	0	0	0	0	0	0	0
Unknown Rhodobacteraceae	0	44	127	33	162	127	887	92	144	789	35	151	12	438	884	172	53	448	95	818	224	2	20	0	5	7	21	10	42
Litoreibacter	0	9	30	5	0	0	0	0	6	76	0	20	0	16	0	13	15	0	0	0	11	0	0	0	0	0	0	2	2
Marivita	0	0	0	0	0	0	0	0	6	0	0	0	0	0	0	9	0	0	0	11	6	0	0	0	0	2	0	0	0
Oceaniovalibus	0	7	0	0	0	0	0	0	19	0	0	0	0	7	12	0	0	0	116	0	0	0	0	0	0	0	0	0	0
Paracoccus	0	39	0	0	21	9	82	60	32	34	0	33	4	20	69	21	12	0	487	248	7	8	4	12	6	8	0	23	15
Sneathiella	0	0	0	0	0	0	0	0	9	0	0	0	0	10	0	0	0	0	5	0	0	0	0	0	0	8	0	0	0
Altererythrobacter	0	9	59	0	19	76	41	23	16	332	0	35	6	26	244	60	13	92	362	502	33	0	8	10	0	4	4	13	2
Erythrobacter	0	37	37	11	2	50	19	0	15	9	0	32	2	65	54	30	47	0	0	73	10	0	0	0	0	0	2	0	0
Novosphingobium	0	14	15	8	21	32	0	19	2	80	0	5	0	40	14	6	2	0	32	235	5	2	0	0	0	0	0	0	3
Sphingomonas	0	0	0	0	0	0	192	0	8	13	0	6	0	0	0	0	0	0	85	321	4	2	10	0	2	2	3	8	8
Sphingorhabdus	0	34	0	0	0	47	151	0	18	7	0	60	5	48	33	8	17	0	0	148	21	0	0	0	0	4	0	4	2
Aliiglaciecola	0	13	41	0	0	93	0	0	35	222	392	15	0	58	52	0	0	0	174	195	40	0	0	0	2	2	2	0	4
Alteromonas	0	0	0	0	15	0	0	0	8	5	0	0	0	0	13	0	0	0	7	6	2	0	0	0	0	0	0	0	0
Idiomarina	0	47	43	24	142	0	40	0	29	129	0	21	114	20	112	38	41	0	1478	409	8	0	0	0	3	0	2	0	6
Marinobacter	0	18	17	10	188	26	124	3	42	86	64	23	0	5	69	11	4	0	356	382	31	12	10	0	2	0	0	4	18
Pseudoalteromonas	0	59	0	10	83	152	420	14	59	24	809	44	10	72	336	25	47	1487	4998	386	63	12	15	12	15	12	4	5	65
Shewanella	0	23	2	14	0	0	607	0	26	19	0	0	0	0	0	26	0	572	43	108	7	27	23	12	22	23	34	16	64
Unknown Comamonadaceae	0	0	44	0	14	117	0	33	2	131	0	6	0	0	0	2	0	0	208	118	8	1	3	2	0	0	10	0	0
Comamonas	0	0	0	0	0	0	0	0	16	24	0	0	0	5	3	5	0	0	0	0	6	7	4	0	6	2	16	11	4
Schlegelella	0	0	0	0	0	24	15	0	23	72	0	0	0	7	13	0	0	0	0	0	0	0	0	0	0	0	0	0	0
Hydrogenophilus	0	9	0	0	8	31	0	0	10	40	0	0	0	0	8	0	0	0	0	0	0	0	0	0	0	0	0	0	0
Methylotenera	0	0	0	0	0	0	0	4	14	0	0	0	0	0	0	0	0	0	0	0	0	0	0	0	0	0	0	0	4
Neisseria	0	0	0	0	0	0	0	0	2	0	0	0	0	0	8	0	0	0	0	76	0	3	3	2	2	0	5	2	6
Unknown Oxalobacteraceae	0	0	0	0	0	0	0	0	2	0	0	0	0	0	0	0	0	0	0	0	0	0	0	7	2	0	2	0	0
Cellvibrionaceae	0	18	0	10	9	0	0	0	59	0	0	0	0	10	37	18	0	32	144	0	0	0	0	0	0	0	0	0	0
Providencia	0	31	0	0	5	0	37	9	6	63	0	0	2	0	0	0	0	0	0	0	118	306	310	5293	4081	4387	33	21	67
Alcanivorax	0	41	14	0	3	0	0	0	14	0	0	12	0	4	17	21	0	0	0	131	0	0	0	0	0	0	0	3	19
Halomonas	0	10	0	0	10	0	0	9	38	125	0	23	13	9	71	27	9	0	248	97	0	0	0	0	0	0	6	0	2
Acinetobacter	0	87	164	23	25	451	118	548	19	150	0	66	3	32	59	15	2	192	697	350	37	13	52	80	82	91	7	8	20
Psychrobacter	0	82	54	3	7	97	538	0	2	33	0	35	0	21	40	35	4	128	68	125	16	21	41	7	0	10	3	12	15
Pseudomonas	0	804	288	151	255	4454	1373	960	476	2374	2689	381	55	334	1967	425	260	796	5323	8493	1073	144	405	473	455	591	236	259	337
Salinisphaera	0	46	35	5	19	26	4	17	128	278	251	58	0	46	235	30	46	0	208	479	21	0	5	0	0	4	5	7	16
Oceanococcus	0	0	0	0	0	0	0	0	15	0	0	5	0	0	0	0	0	0	0	0	0	0	0	0	0	0	0	0	0
Stenotrophomonas	0	0	0	0	0	0	0	0	2	0	0	0	0	0	0	0	0	0	0	9	68	39	25	75	47	83	12	4	19
Thermomonas	0	0	0	0	0	0	0	0	9	0	0	0	0	0	0	0	0	0	0	0	0	0	0	0	0	2	0	0	0
Rubritalea	0	15	56	0	14	6	51	0	2	35	0	105	0	17	10	27	112	0	294	109	36	0	0	0	0	2	0	0	0
WPS-2	0	20	24	6	0	11	0	0	8	30	0	0	0	30	0	45	14	0	133	43	0	0	0	0	0	2	0	0	0
Halomarina	0	0	0	0	0	0	0	0	0	0	0	0	0	12	17	0	0	0	0	0	0	0	0	0	0	0	0	0	0
Unknown Micromonosporaceae	0	0	0	0	0	0	0	0	0	0	0	0	0	0	45	0	0	0	0	0	0	0	0	0	0	0	0	0	0
Nocardioides	0	28	30	5	2	109	3	0	0	186	0	0	0	24	122	14	19	0	513	569	12	0	2	12	5	12	15	2	8
Persicitalea	0	0	0	0	0	0	0	0	0	0	0	0	0	0	13	0	0	0	0	0	0	0	0	0	0	0	0	0	0
Flavobacterium	0	14	0	5	17	52	0	0	0	125	0	9	7	12	19	17	10	38	286	91	7	3	79	64	67	58	12	2	7
Jejudonia	0	0	0	0	2	0	0	0	0	0	0	0	0	0	72	0	0	0	0	0	8	0	0	0	0	0	0	0	3
Marixanthomonas	0	0	0	0	9	59	0	0	0	26	0	0	0	14	20	2	0	0	139	0	0	0	0	0	0	0	0	0	0
NS3a_marine_group	0	0	0	0	0	0	0	0	0	0	0	0	0	0	110	0	0	16	0	0	0	0	0	0	0	0	0	0	0
Pseudozobellia	0	0	0	0	0	0	0	0	0	0	0	0	0	0	82	9	0	0	0	0	0	0	0	2	0	0	0	0	0
Calorithrix	0	0	0	0	0	0	0	0	0	0	26	0	0	0	41	0	10	0	0	0	3	0	0	0	0	0	0	0	0
A4b	0	0	0	0	0	0	0	0	0	0	0	11	0	0	117	0	0	0	0	0	10	0	0	0	0	0	0	0	0
PB19	0	14	0	0	12	87	71	12	0	12	0	3	0	19	99	0	16	0	37	77	12	0	0	0	7	0	0	0	15
Geobacillus	0	1097	578	148	473	1373	796	2	0	0	0	0	0	0	60	0	0	27	69	193	34	49	107	20	12	14	23	20	25
Weissella	0	140	0	69	176	343	83	0	0	0	0	20	0	2	207	0	0	0	595	59	176	294	499	268	235	262	230	240	345
Lactococcus	0	34	20	12	0	82	2	0	0	0	0	0	0	0	27	0	0	0	0	75	0	28	4	6	6	0	6	2	9
Vagococcus	0	15	0	0	4	0	175	14	0	50	0	16	6	0	28	0	0	0	0	29	16	17	35	79	61	76	30	28	20
Ammoniphilus	0	0	0	0	0	0	0	0	0	0	0	2	0	0	38	0	0	0	0	0	3	0	0	0	3	4	0	0	0
Paenibacillaceae	0	4	0	2	0	11	0	0	0	0	0	0	0	0	34	0	0	0	0	0	10	0	0	2	5	13	0	0	0
Ruminiclostridium	0	0	0	0	0	0	0	0	0	0	0	0	0	3	17	0	0	0	0	80	0	0	0	0	0	2	0	0	0
Clostridium_sensu_stricto_12	0	8	0	0	0	6	0	0	0	0	0	0	0	0	11	0	0	0	0	61	0	0	0	0	0	0	0	0	0
Hathewaya	0	258	159	44	57	95	606	3	0	0	0	29	0	2	25	6	0	0	84	35	0	2	21	0	0	0	8	0	0
Unknown Lachnospiraceae	0	31	0	10	3	0	215	7	0	0	0	0	0	8	73	0	0	0	0	56	14	4	0	63	63	50	89	83	91
Anaerocolumna	0	19	0	2	0	2	127	5	0	0	0	0	0	0	200	0	10	0	0	229	0	0	0	0	0	0	0	3	2
Herbinix	0	0	0	0	0	0	0	0	0	0	0	0	0	0	14	0	0	0	0	0	0	0	0	0	0	0	0	0	0
Lachnoclostridium	0	2	21	8	0	0	110	0	0	0	0	0	4	0	17	0	0	0	0	83	18	0	4	31	50	41	32	35	54
Natranaerovirga	0	0	0	0	0	2	0	0	0	0	0	0	0	0	40	0	0	0	0	0	0	0	0	0	0	0	0	0	0
Robinsoniella	0	0	17	0	0	0	28	0	0	0	0	0	0	0	18	0	0	0	0	117	0	0	0	2	5	0	12	4	9
[Eubacterium]_fissicatena_group	0	2	19	0	0	0	0	0	0	0	0	0	0	0	26	0	0	0	0	11	15	0	4	8	13	11	20	21	16
[Ruminococcus]_torques_group	0	0	0	0	0	0	0	0	0	0	0	0	0	0	73	0	0	0	0	0	0	0	0	0	0	0	0	0	0
Paeniclostridium	0	31	6	2	0	8	0	0	0	0	0	0	2	0	573	0	69	0	0	33	0	0	0	0	0	0	10	10	10
Peptoniphilus	0	0	0	0	0	10	14	0	0	0	0	6	4	0	16	0	4	0	0	0	2	0	4	8	7	12	8	0	3
Tepidimicrobium	0	22	31	17	6	45	0	0	0	0	0	0	0	0	93	0	0	0	0	145	2	3	10	5	2	0	3	6	10
Desulfohalotomaculum	0	0	0	0	0	0	0	0	0	0	0	0	0	0	14	0	0	0	0	0	0	0	0	0	0	0	0	0	0
BIrii41	0	0	27	0	0	16	0	92	0	55	216	28	0	5	235	0	21	0	0	4	19	0	0	0	0	0	7	0	0
Unknown Sandaracinaceae	0	0	0	0	0	0	0	0	0	3	0	6	0	13	2	0	0	0	0	0	0	0	0	0	0	0	2	0	0
bacteriap25	0	0	0	0	0	0	0	0	0	0	0	0	0	0	10	0	0	0	0	0	0	0	0	0	0	0	0	0	0
Saccharimonadales	0	0	0	0	0	11	154	0	0	0	0	0	0	0	25	0	16	0	141	122	0	0	0	0	0	0	0	0	0
OM190	0	0	0	5	0	20	0	0	0	23	0	0	0	44	31	0	0	0	0	227	9	0	0	0	0	0	0	0	3
Gemmata	0	13	0	0	0	0	0	0	0	0	0	0	0	0	33	0	0	0	0	0	0	0	0	0	0	0	0	0	0
Pirellula	0	2	0	0	0	0	0	0	0	5	0	0	0	0	34	0	0	0	0	0	7	0	0	0	0	0	0	0	0
Gimesia	0	0	0	0	0	0	0	0	0	0	0	0	0	0	67	0	0	0	0	0	0	0	0	0	0	0	0	0	0
Niveispirillum	0	0	0	0	0	0	0	0	0	0	0	0	0	0	54	0	0	0	0	0	0	0	0	0	0	0	0	0	0
Devosia	0	2	0	0	0	2	0	0	0	2	0	0	0	0	4	0	0	0	0	2	0	0	0	0	0	0	0	0	2
Filomicrobium	0	0	0	0	0	0	0	0	0	0	0	0	0	10	4	10	0	3	0	67	1	0	0	0	0	2	0	0	2
Hyphomicrobium	0	0	0	0	0	98	0	0	0	47	0	0	0	5	22	0	16	0	77	42	6	0	0	3	0	0	0	0	0
Ahrensia	0	5	0	0	0	0	0	0	0	33	0	3	0	16	44	8	4	0	0	27	1	0	0	0	0	0	0	0	0
Hoeflea	0	0	0	0	0	0	79	0	0	0	0	0	0	0	38	0	18	0	0	0	0	4	0	0	0	2	0	0	0
Anderseniella	0	0	0	0	0	0	0	0	0	0	0	0	0	0	14	0	0	0	0	0	0	0	0	0	0	0	0	0	0
Sulfitobacter	0	44	34	16	41	96	119	17	0	0	139	37	5	60	135	15	12	0	387	540	38	0	2	0	0	0	2	2	14
Unknown Sphingomonadaceae	0	67	130	2	18	63	283	23	0	206	0	64	0	91	129	59	23	0	215	627	16	0	3	0	0	0	0	0	0
Sphingobium	0	0	0	0	0	0	0	0	0	32	0	0	0	4	40	0	0	0	0	0	4	0	0	0	0	0	0	0	0
Catenovulum	0	0	14	0	13	0	0	0	0	0	0	5	0	0	13	0	0	0	110	41	0	0	0	0	3	0	0	0	0
Arenicella	0	0	0	0	0	0	0	0	0	0	0	0	0	0	30	0	0	0	0	0	0	0	0	0	0	0	0	0	0
Unknown Burkholderiaceae	0	0	0	0	0	0	0	0	0	30	0	0	0	0	9	0	0	0	0	0	0	0	0	0	0	0	0	0	2
Tepidimonas	0	0	0	0	11	13	0	311	0	35	0	0	0	0	31	0	0	0	0	197	0	0	6	0	0	0	0	5	0
Janthinobacterium	0	0	0	0	0	0	0	0	0	0	0	0	0	0	10	0	0	0	0	0	0	6	4	26	13	20	4	0	0
Gilvimarinus	0	0	0	0	0	0	0	0	0	0	0	0	0	0	19	0	0	0	329	0	4	0	0	30	14	16	0	0	0
Saccharophagus	0	0	0	0	0	14	0	0	0	0	0	0	0	16	34	0	13	0	0	75	15	0	0	0	0	0	0	0	2
Marimicrobium	0	0	0	0	3	0	66	0	0	35	0	0	0	12	6	0	13	0	0	28	8	0	0	0	0	0	0	0	0
Unknown Enterobacteriaceae	0	0	0	2	0	35	40	17	0	0	0	0	0	0	10	0	0	0	42	28	214	90	126	437	355	345	69	57	51
Unknown_Family	0	0	0	0	0	0	0	0	0	0	0	0	0	0	40	0	0	0	0	0	0	0	0	0	0	0	0	0	0
Milano-WF1B-44	0	10	0	0	16	23	0	0	0	49	0	7	0	0	30	2	2	0	0	48	0	3	0	0	0	0	0	0	2
Ketobacter	0	185	122	21	12	85	0	36	0	0	0	14	0	4	89	4	21	0	79	264	12	0	0	0	0	0	3	0	14
Pseudohongiella	0	16	0	0	0	0	0	0	0	0	0	0	0	2	36	0	0	0	20	0	0	0	0	0	0	0	0	0	0
Unknown Saccharospirillaceae	0	10	0	2	4	16	7	0	0	0	0	2	2	0	46	0	0	0	0	43	0	0	0	0	0	0	0	0	7
Oceanobacter	0	0	0	0	0	4	0	0	0	0	0	0	0	0	4	0	0	0	0	3	0	0	0	0	0	0	0	0	0
Luteimonas	0	0	0	0	0	0	0	6	0	0	0	0	0	26	12	0	0	0	0	0	0	2	0	0	0	0	0	0	0
Pseudoxanthomonas	0	0	0	0	0	0	0	0	0	0	0	0	10	0	46	0	0	0	439	0	0	0	3	0	0	0	0	0	0
Persicirhabdus	0	0	0	0	0	10	0	0	0	44	0	47	0	12	109	0	11	0	0	0	13	3	0	0	0	0	0	7	0
Curtobacterium	0	10	0	3	0	0	0	0	0	0	0	0	0	0	0	7	0	0	0	0	11	9	15	0	0	1	9	4	5
Arthrobacter	0	5	0	0	0	0	0	0	0	0	0	0	0	0	0	36	0	0	0	4	0	0	3	0	0	2	0	0	0
Micrococcus	0	0	0	0	5	0	49	0	0	43	0	0	0	0	0	6	0	0	0	76	2	0	0	0	0	0	0	2	0
Aeromicrobium	0	0	0	0	7	35	0	0	0	0	0	0	0	0	0	8	0	0	0	0	0	3	0	15	14	15	0	2	0
Kriegella	0	0	0	0	0	0	0	0	0	0	0	0	0	0	0	10	0	0	0	0	0	0	0	0	0	0	0	0	0
Leeuwenhoekiella	0	0	0	0	11	0	0	35	0	0	0	0	0	0	0	8	0	0	0	0	0	0	0	0	0	0	0	0	0
Mesonia	0	0	0	0	0	4	0	0	0	0	0	0	0	19	0	11	0	0	0	48	0	0	0	0	0	0	0	0	0
Salegentibacter	0	22	0	8	0	0	0	0	0	0	0	0	0	19	0	25	0	0	353	0	18	0	0	2	0	0	0	0	0
Leuconostoc	0	56	52	12	0	16	94	0	0	0	0	3	0	0	0	2	5	0	9	0	9	30	53	26	7	4	16	5	20
Unknown Peptostreptococcales-Tissierellales	0	10	0	3	0	0	0	0	0	0	0	9	2	0	0	2	0	0	0	115	0	0	0	0	0	0	0	0	0
Pir4_lineage	0	21	0	12	0	104	0	0	0	45	0	70	0	0	0	17	46	0	0	526	6	0	0	0	4	2	0	0	4
Ponticaulis	0	0	0	0	0	0	0	0	0	0	0	0	0	9	0	6	0	0	0	0	0	0	0	0	0	0	0	0	0
Limimaricola	0	0	0	0	0	0	7	0	0	0	0	0	0	0	0	6	0	12	0	0	0	0	0	0	0	0	0	0	0
Aeromonas	0	2	0	0	0	0	6	0	0	0	0	0	0	0	0	4	0	0	0	0	11	38	47	742	625	832	9	8	25
Unknown Alteromonadaceae	0	0	0	5	39	0	0	0	0	3	0	0	0	5	0	9	0	0	104	21	2	0	0	0	0	0	0	0	2
Salinimonas	0	19	0	4	0	0	8158	0	0	2	0	4	0	0	0	4	0	0	0	1	0	0	0	0	0	0	0	0	0
Thalassotalea	0	37	0	0	0	0	0	0	0	0	0	0	2	2	0	5	3	0	117	0	0	0	0	0	2	0	0	0	3
Massilia	0	8	0	0	2	0	0	0	0	0	0	0	0	64	0	24	0	0	0	554	4	7	10	19	3	11	10	11	14
Aeriscardovia	0	12	0	0	0	0	0	0	0	0	0	0	0	0	0	0	0	0	0	0	0	0	6	32	16	22	0	2	0
Bifidobacterium	0	0	0	0	0	0	0	0	0	0	0	0	0	0	0	0	14	0	0	0	0	13	14	14	4	16	8	9	22
AKAU3644	0	0	0	6	0	0	0	0	0	9	0	20	0	0	0	0	0	0	0	0	2	0	8	262	223	225	0	0	0
Bogoriella	0	0	0	0	0	0	0	0	0	0	0	0	0	0	0	0	0	0	0	0	0	0	0	27	19	28	0	2	5
Unknown Intrasporangiaceae	0	7	0	0	6	0	0	0	0	0	0	0	2	4	0	0	0	0	0	53	0	0	0	17	16	9	0	0	0
Gulosibacter	0	0	0	0	0	0	0	0	0	0	0	0	0	0	0	0	0	0	0	0	0	0	1	3	4	4	0	0	0
Unknown Micrococcaceae	0	0	0	0	0	0	35	0	0	0	0	0	0	0	0	0	0	0	0	107	2	0	0	8	8	5	0	0	0
Enteractinococcus	0	4	0	0	0	0	0	8	0	0	0	0	2	0	0	0	0	0	0	0	8	11	16	71	64	76	3	3	0
Nesterenkonia	0	0	0	0	0	0	105	0	0	0	0	0	0	0	0	0	0	0	0	11	5	9	31	6	4	3	0	7	39
Yaniella	0	0	0	0	0	0	0	0	0	0	0	0	0	0	0	0	0	0	0	0	2	4	5	22	16	12	0	0	0
Timonella	0	0	0	0	0	0	0	0	0	0	0	0	0	0	0	0	0	0	0	0	0	0	0	3	6	5	0	0	0
Cellulosimicrobium	0	0	0	0	0	0	0	0	0	0	0	0	0	0	0	0	0	0	0	0	0	0	0	8	2	2	0	0	0
Sanguibacter	0	0	0	4	21	0	0	0	0	6	0	0	0	0	0	0	0	0	392	0	0	8	10	36	17	36	0	7	15
Bacteroides	0	0	0	0	0	0	0	0	0	0	0	47	0	0	0	0	15	0	0	0	14	12	3	186	209	167	264	258	354
Dysgonomonadaceae	0	0	0	0	0	0	0	0	0	0	0	0	0	0	0	0	0	0	0	0	6	7	4	153	122	125	379	418	543
Dysgonomonas	0	0	0	0	0	2	0	0	0	14	0	2	0	0	0	0	0	0	0	0	16	22	82	508	485	484	701	512	784
Proteiniphilum	0	0	0	0	0	0	0	0	0	0	0	0	0	0	0	0	0	0	0	0	0	0	0	8	5	4	3	0	2
Taibaiella	0	0	0	0	0	0	0	0	0	24	0	0	0	0	0	0	14	0	0	104	11	0	0	3	7	9	0	0	0
Fluviicola	0	23	0	0	0	0	0	0	0	0	0	0	11	77	0	0	10	0	0	0	22	14	0	64	55	54	0	2	0
Weeksella	0	0	0	0	0	0	0	0	0	0	0	0	0	0	0	0	0	0	0	0	0	0	0	16	18	12	0	0	0
Unknown Sphingobacteriaceae	0	0	0	0	0	0	0	0	0	0	0	0	0	0	0	0	0	0	0	0	0	0	0	6	2	3	0	0	0
Parapedobacter	0	0	0	0	0	0	0	0	0	0	0	0	0	0	0	0	0	0	0	0	0	0	0	4	4	6	0	0	0
Pedobacter	0	0	0	0	0	0	0	0	0	168	0	0	0	0	0	0	0	0	0	0	0	6	9	63	46	41	4	0	2
Sphingobacterium	0	0	0	0	0	0	0	19	0	0	0	0	8	0	0	0	0	0	0	0	165	30	64	1105	900	920	30	11	23
Campylobacter	0	0	0	0	0	0	0	0	0	0	0	0	0	0	0	0	0	0	0	0	0	0	0	33	28	23	0	3	0
Desulfovibrio	0	0	0	0	0	0	0	0	0	0	0	0	0	0	0	0	0	0	0	0	0	0	3	58	43	54	45	16	53
Amphibacillus	0	13	23	0	0	0	0	0	0	26	0	0	0	0	0	0	0	0	0	0	12	22	21	117	102	124	12	10	9
Erysipelatoclostridium	0	0	0	0	0	0	0	0	0	0	0	0	0	0	0	0	0	0	0	0	0	0	0	14	21	12	12	5	10
Breznakia	0	0	0	0	0	0	0	0	0	0	0	0	0	0	0	0	0	0	0	0	0	0	0	11	7	23	6	2	2
Erysipelothrix	0	28	0	0	0	0	0	0	0	0	0	13	0	0	0	0	0	0	0	0	39	139	66	771	800	868	85	72	120
Globicatella	0	7	0	0	0	0	0	0	0	0	0	13	0	0	0	0	0	0	0	0	0	7	21	33	30	23	5	12	21
Aliicoccus	0	0	0	0	0	0	0	0	0	0	0	0	0	0	0	0	0	0	0	0	0	0	0	22	16	26	0	0	0
Jeotgalicoccus	0	0	0	0	13	0	0	0	0	0	0	9	0	0	0	0	0	0	0	0	2	7	2	31	13	3	17	18	29
Christensenellaceae	0	0	0	0	0	0	0	0	0	0	0	0	0	0	0	0	0	0	0	0	0	0	0	0	0	3	3	6	6
Clostridium	0	11	0	0	0	0	0	0	0	0	0	0	0	0	0	0	0	0	0	0	0	0	0	11	12	12	7	8	12
Clostridiaceae	0	0	0	0	0	0	0	0	0	0	0	0	0	0	0	0	0	0	0	0	0	0	0	0	0	3	4	0	3
Tyzzerella	0	0	0	0	0	0	0	0	0	0	0	0	0	0	0	0	0	0	0	0	0	0	0	6	6	9	9	5	17
Incertae_Sedis	0	0	0	0	0	0	0	0	0	0	0	0	0	0	0	0	0	0	0	0	2	3	2	32	36	21	48	52	60
Anaerovorax	0	0	0	0	0	0	0	0	0	0	0	0	0	0	0	0	0	0	0	0	0	0	2	3	3	2	0	0	0
Helcococcus	0	15	0	0	0	0	0	7	0	0	0	0	0	0	0	0	0	0	0	0	0	0	0	3	0	4	0	0	0
Tissierella	0	107	59	2	6	6	0	0	0	0	0	2	3	0	0	0	0	0	0	0	6	0	0	5	0	10	0	0	0
W5053	0	0	0	0	0	0	0	0	0	0	0	0	0	0	0	0	0	0	0	0	5	0	0	0	4	4	0	0	0
Phascolarctobacterium	0	0	0	0	0	0	0	0	0	0	0	0	0	0	0	0	0	0	0	0	0	0	5	14	0	2	38	30	26
Megasphaera	0	0	0	0	0	0	0	0	0	0	0	0	0	0	0	0	0	0	0	0	13	6	42	10	6	13	28	17	27
Fusobacterium	0	0	0	0	0	0	58	0	0	0	0	0	0	0	0	0	0	0	0	0	14	10	4	16	13	5	10	3	7
Psychrilyobacter	0	0	0	0	0	0	0	0	0	0	0	0	0	0	0	0	0	0	0	0	4	19	18	14	10	14	12	4	9
TM7a	0	0	0	0	0	0	0	0	0	10	0	11	0	0	0	0	0	0	0	95	0	0	0	9	9	12	0	0	0
Acetobacter	0	0	0	0	0	0	0	0	0	0	0	0	0	0	0	0	0	0	0	0	2	9	8	2	0	4	0	0	2
Brevundimonas	0	0	0	5	0	0	33	0	0	0	0	0	0	7	0	0	0	0	0	0	0	0	0	3	2	6	0	0	8
Aquamicrobium	0	0	0	0	0	0	0	0	0	0	0	2	0	0	0	0	0	0	0	0	0	0	0	18	8	5	0	0	0
Paenochrobactrum	0	0	0	0	18	42	0	0	0	14	0	39	0	0	0	0	0	0	0	0	20	5	39	165	116	178	15	13	18
Pseudochrobactrum	0	0	0	0	0	0	127	0	0	0	0	12	7	0	0	0	0	0	0	0	2	3	0	16	16	21	0	0	0
Pontibaca	0	0	0	0	0	0	0	0	0	0	0	0	0	0	0	0	0	0	0	0	0	2	0	3	5	5	0	0	0
Sphingopyxis	0	0	0	0	0	0	0	0	0	0	0	0	0	0	0	0	0	0	0	233	0	0	0	4	9	14	0	0	0
Moritella	0	0	0	0	0	0	28	0	0	0	0	0	0	0	0	0	0	0	0	0	1	4	10	7	3	8	5	12	12
Psychromonas	0	0	0	0	0	0	0	0	0	0	0	0	0	0	0	0	0	0	0	0	0	0	4	2	4	1	2	5	2
Unknown Alcaligenaceae	0	0	0	0	0	0	252	0	0	0	0	0	0	0	0	0	0	0	0	0	0	4	13	74	56	59	0	0	0
Alcaligenes	0	0	0	0	0	0	0	0	0	0	0	18	0	0	0	0	0	0	0	0	79	47	68	610	448	583	12	8	13
Oligella	0	0	0	0	0	0	0	0	0	0	0	0	0	0	0	0	0	0	0	0	2	0	0	7	3	3	0	0	0
Paenalcaligenes	0	0	0	0	0	0	0	0	0	31	0	0	4	0	0	0	0	0	0	0	30	51	78	541	371	528	55	91	68
Parapusillimonas	0	0	0	0	0	0	0	0	0	0	0	0	0	0	0	0	0	0	0	0	0	0	2	3	0	5	0	0	0
Ignatzschineria	0	14	0	0	6	0	0	0	0	83	0	12	0	0	0	0	0	0	0	0	142	219	187	1792	1971	1915	89	100	132
Koukoulia	0	0	0	0	0	0	0	0	0	0	0	0	0	0	0	0	0	0	0	0	5	6	17	247	91	138	11	5	3
Wohlfahrtiimonas	0	0	0	0	0	0	0	0	0	0	0	0	0	0	0	0	0	0	0	0	0	6	4	9	30	12	0	8	10
Cellvibrio	0	0	0	0	0	0	0	0	0	0	0	15	0	0	0	0	0	0	0	0	0	0	0	6	4	14	0	0	0
Unknown Erwiniaceae	0	2	0	0	0	0	0	0	0	0	0	0	0	0	0	0	0	0	0	44	27	107	125	77	62	95	151	152	207
Morganella	0	7	0	0	0	0	0	0	0	28	0	0	0	0	0	0	0	0	0	0	9	31	36	993	591	664	10	29	14
Proteus	0	0	0	0	0	0	0	11	0	0	17	0	0	0	0	0	0	0	0	0	132	393	429	2779	2497	2742	12	13	27
Serratia	0	0	0	0	0	0	0	0	0	0	0	0	0	0	0	0	0	0	0	0	7	27	24	272	223	224	10	6	3
Unknown Orbaceae	0	0	0	0	0	0	0	0	0	0	0	0	0	0	0	0	0	0	0	0	0	0	0	16	14	10	0	0	0
Gilliamella	0	0	0	0	0	0	0	0	0	0	0	0	0	0	0	0	0	0	0	0	0	0	0	2	3	3	0	0	2
Oblitimonas	0	0	0	0	0	0	0	11	0	0	0	0	0	0	0	0	0	0	0	0	23	57	41	514	518	437	4	12	9
Aliivibrio	0	48	19	228	0	0	240	0	0	0	0	0	0	0	0	0	0	0	0	0	7	18	12	9	8	13	27	23	16
Halococcus	0	0	0	0	8	22	0	0	0	0	0	25	0	11	0	0	0	0	0	85	0	0	0	0	0	0	2	0	0
Rathayibacter	0	6	24	0	4	0	0	0	0	0	0	0	0	0	0	0	0	0	0	0	2	3	2	0	0	0	2	0	0
Pseudonocardiaceae	0	8	0	0	0	0	0	0	0	0	0	0	0	0	0	0	0	0	0	0	0	0	0	0	0	0	6	0	0
Saccharopolyspora	0	0	0	0	0	20	0	0	0	0	0	0	0	0	0	0	0	0	0	9	0	3	2	0	3	0	2	0	2
Chryseolinea	0	0	0	0	0	0	0	38	0	48	0	23	0	19	0	0	0	0	0	306	2	0	0	0	0	0	5	0	2
Unknown Weeksellaceae	0	0	0	0	0	9	0	25	0	0	0	0	0	0	0	0	0	0	0	0	3	0	0	0	0	0	3	0	0
Sericytochromatia	0	0	0	0	0	11	0	0	0	31	0	0	0	0	0	0	0	0	0	7	10	0	0	0	0	0	2	0	7
Thermus	0	0	0	0	0	0	0	2	0	0	0	17	0	0	0	0	0	0	22	0	8	0	0	0	0	0	4	0	3
Caldibacillus	0	2	7	0	4	0	0	0	0	0	0	0	0	0	0	0	0	0	0	0	0	2	9	3	2	0	3	0	2
Sinibacillus	0	8	0	0	0	10	0	0	0	0	0	0	0	0	0	0	0	0	0	0	0	6	8	4	3	0	10	11	5
Brevibacillus	0	45	0	8	11	22	0	0	0	0	0	0	0	0	0	0	0	0	0	0	7	2	0	0	0	0	3	6	17
Eremococcus	0	0	0	0	0	0	0	56	0	224	0	8	0	7	0	0	0	0	141	17	17	0	0	0	0	0	2	0	0
Paraclostridium	0	15	0	7	12	0	0	0	0	0	0	0	0	0	0	0	0	0	0	0	2	0	3	3	0	0	8	8	0
BD7-11	0	0	0	0	0	0	0	0	0	0	0	75	0	0	0	0	0	0	0	0	0	0	0	0	0	0	5	0	2
Allorhizobium-Neorhizobium-Pararhizobium-Rhizobium	0	23	0	0	0	0	0	0	0	86	322	6	0	10	0	0	0	0	14	0	3	2	0	2	2	0	2	0	2
HTCC5015	0	0	0	0	0	10	0	0	0	0	0	0	0	3	0	0	0	0	0	0	0	0	0	0	0	0	3	0	0
Duganella	0	0	0	0	0	0	0	0	0	0	0	0	0	0	0	0	0	0	0	0	0	3	0	2	0	0	2	2	2
Leminorella	0	0	0	0	0	0	0	0	0	0	0	0	0	0	0	0	0	0	0	0	0	0	0	0	0	0	14	11	7
Unknown Yersiniaceae	0	0	0	0	0	0	0	0	0	0	0	0	0	0	0	0	0	0	0	0	0	4	18	1	0	0	16	7	10
Enhydrobacter	0	15	34	0	5	0	0	1195	0	11	0	0	0	2	0	0	0	299	0	76	0	0	0	0	0	0	2	0	0
Dokdonella	0	0	0	0	0	0	0	0	0	0	0	0	0	0	0	0	0	0	0	6	4	0	0	0	0	0	2	0	0
Xylella	0	0	0	0	0	0	0	0	0	0	0	0	0	0	0	0	0	0	0	0	0	0	0	0	0	0	31	0	0
Glutamicibacter	0	0	0	0	8	0	0	0	0	0	0	0	0	0	0	0	0	0	0	0	3	11	64	4	0	0	0	0	5
37-13	0	0	0	0	0	0	0	0	0	0	0	5	0	0	0	0	13	0	0	0	0	0	0	0	0	0	0	0	2
Hymenobacter	0	0	0	0	0	0	0	0	0	0	0	0	0	0	0	0	0	0	66	0	0	0	0	0	0	0	0	2	2
Flavobacteriaceae	0	0	0	0	0	0	0	0	0	0	0	0	0	7	0	0	0	0	0	0	2	0	0	0	0	0	0	0	3
Sinobaca	0	0	0	0	0	0	0	0	0	0	0	0	0	0	0	0	0	0	0	0	0	3	0	2	2	0	0	3	2
Carnobacterium	0	0	0	0	0	0	0	0	0	0	0	0	0	0	0	0	0	0	0	43	8	25	22	0	1	0	0	0	3
Thermobacillus	0	8	0	2	0	0	0	0	0	0	0	0	0	0	0	0	0	0	0	0	0	0	0	0	0	0	0	2	5
Unknown Oscillospiraceae	0	0	0	0	0	0	0	0	0	0	0	0	0	0	0	0	0	0	0	0	0	0	0	0	7	0	0	0	3
P3OB-42	0	0	24	0	0	0	0	0	0	0	20	0	0	0	0	0	0	0	0	0	0	0	0	0	2	0	0	0	18
Methylobacterium-Methylorubrum	0	0	0	0	0	0	0	0	0	0	0	24	0	0	0	0	35	0	0	0	0	0	0	0	3	0	0	0	7
Roseovarius	0	0	0	0	2	0	0	0	0	0	0	0	0	0	0	0	0	0	0	0	4	0	0	0	0	0	0	0	4
Hydrogenophaga	0	6	0	3	13	11	0	0	0	0	123	0	0	0	0	0	6	0	0	19	2	0	2	0	0	0	0	0	2
Kangiella	0	0	0	0	0	0	0	0	0	0	0	0	0	0	0	0	0	283	0	0	0	0	0	0	0	0	0	0	3
Oceaniserpentilla	0	7	0	0	0	0	0	0	0	0	0	6	0	0	0	0	0	0	0	0	0	0	0	0	0	0	0	0	3
Candidatus_Nitrocosmicus	0	0	10	0	13	0	0	0	0	0	0	0	0	0	0	0	0	0	0	0	0	0	0	0	0	0	0	0	0
Halolamina	0	3	7	0	0	5	0	0	0	0	0	2	0	0	0	0	0	0	0	0	0	0	0	0	0	0	0	0	0
Raoultibacter	0	0	5	0	0	0	29	0	0	0	0	0	0	0	0	0	0	0	0	0	0	0	0	0	0	0	0	0	0
Bdellovibrio	0	0	40	0	0	0	0	0	0	0	0	0	0	17	0	0	16	0	0	136	0	0	0	0	0	0	0	0	0
Babeliaceae	0	17	39	13	0	20	190	0	0	0	0	0	0	0	0	0	0	0	0	0	0	0	0	0	0	0	0	0	0
Fictibacillus	0	0	15	0	0	0	0	0	0	0	0	0	0	0	0	0	0	0	0	0	0	0	0	0	0	0	0	0	0
Novibacillus	0	7	24	0	0	24	0	0	0	0	0	0	0	0	0	0	0	0	0	0	0	0	0	0	0	0	0	0	0
Thermoflavimicrobium	0	0	12	0	0	0	0	0	0	0	0	0	0	0	0	0	0	0	0	0	0	0	0	0	0	0	0	0	0
Caldicoprobacter	0	20	24	0	16	0	40	0	0	0	0	0	0	0	0	0	0	0	0	0	0	0	3	0	3	0	0	0	0
Haloimpatiens	0	1	67	3	0	0	0	0	0	3	0	0	0	0	0	0	0	0	0	0	0	2	0	0	0	0	0	0	0
Garciella	0	0	9	0	0	0	0	0	0	0	0	0	0	0	0	0	0	0	0	0	0	0	0	0	2	0	0	0	0
S5-A14a	0	0	14	0	0	0	0	0	0	0	0	0	0	0	0	0	0	0	0	0	0	0	0	0	0	0	0	0	0
Romboutsia	0	7	4	0	0	0	0	0	0	0	0	0	0	0	0	0	0	0	0	0	0	0	0	0	0	0	0	0	0
Sporanaerobacter	0	35	29	5	12	70	329	0	0	0	0	4	2	0	0	0	0	0	51	0	0	0	0	0	0	0	0	0	0
Hydrogenispora	0	54	11	0	0	0	0	0	0	0	0	0	0	0	0	0	0	0	0	0	0	0	0	0	0	0	0	0	0
Tepidanaerobacter	0	75	16	22	40	136	418	0	0	0	0	0	0	0	0	0	0	0	0	270	0	2	0	0	0	0	0	0	0
Undibacterium	0	0	10	0	0	0	0	0	0	0	0	0	0	0	0	0	3	0	0	0	0	0	0	0	0	0	0	0	0
Coxiella	0	4	14	7	0	5	0	0	0	8	0	22	0	0	0	0	0	0	0	0	11	0	0	0	0	0	0	0	0
Cobetia	0	304	210	643	126	57	112	0	0	0	0	8	0	5	0	0	29	0	396	120	6	0	0	0	0	0	0	0	0
Luteibacter	0	0	18	0	0	0	0	0	0	0	0	0	0	0	0	0	0	0	0	0	0	0	0	0	0	0	0	0	0
Unknown Nocardioidaceae	0	0	0	0	0	0	0	0	0	0	0	0	0	0	0	0	0	0	123	0	0	3	0	0	2	0	0	0	0
Planococcus	0	0	0	0	0	0	0	0	0	0	0	0	0	0	0	0	0	0	0	0	4	5	4	0	0	0	0	0	0
Aerococcus	0	0	0	0	0	0	0	9	0	0	0	0	0	0	0	0	0	0	0	0	3	9	2	3	0	0	0	0	0
Thermoactinomyces	0	12	0	13	0	0	0	0	0	0	0	0	0	0	0	0	0	0	0	0	0	2	0	0	3	0	0	3	0
Rothia	0	0	0	0	0	5	0	0	0	0	0	10	0	0	0	0	0	0	15	0	0	0	0	0	0	0	0	0	0
Croceibacter	0	0	0	0	0	0	0	0	0	0	0	18	12	0	0	0	0	0	0	8	0	0	0	0	0	0	0	0	0
Psychroflexus	0	0	0	0	0	0	0	0	0	0	0	11	0	0	0	0	0	0	104	0	0	0	0	0	0	0	0	0	0
Vermiphilaceae	0	0	0	8	0	0	0	0	0	0	0	10	0	2	0	0	0	0	0	0	0	0	0	0	0	0	0	0	0
Defluviitalea	0	0	0	0	0	0	0	0	0	0	0	12	0	0	0	0	0	0	0	0	0	0	0	0	0	0	0	0	0
Anaerosporobacter	0	0	0	0	6	20	0	0	0	0	0	4	0	0	0	0	0	0	0	0	0	0	0	0	0	0	0	0	0
Catonella	0	0	0	0	0	0	0	0	0	0	0	15	0	0	0	0	0	0	0	0	0	0	0	0	0	0	0	0	0
Faecalibacterium	0	0	0	0	0	0	0	11	0	0	0	23	0	0	0	0	0	0	0	0	0	0	0	0	0	0	0	0	0
Finegoldia	0	0	0	0	0	0	0	0	0	13	0	6	0	0	0	0	0	0	2	0	0	0	0	0	0	0	0	0	0
Phycisphaera	0	30	0	0	0	32	0	0	0	0	0	18	0	0	0	0	4	0	0	0	0	0	0	0	0	0	0	0	0
Colwellia	0	0	0	3	11	43	0	0	0	0	0	10	0	0	0	0	0	0	0	0	8	0	0	0	0	0	0	0	0
DBS1	0	0	0	0	0	0	0	0	0	0	0	6	0	0	0	0	0	0	10	0	0	0	0	0	0	0	0	0	0
Unknown Microtrichaceae	0	0	0	0	0	0	0	0	0	0	2	0	0	4	0	0	0	0	0	46	0	0	0	0	0	0	0	0	0
Nocardia	0	0	0	0	0	0	0	0	0	0	0	0	0	18	0	0	0	0	0	0	0	0	0	0	0	0	0	0	0
Jatrophihabitans	0	0	0	0	0	0	0	0	0	0	0	0	0	11	0	0	0	0	0	0	0	0	0	0	0	0	0	0	0
Prevotella	0	0	0	0	0	0	0	27	0	0	0	0	0	15	0	0	11	0	0	0	0	0	0	0	0	0	0	0	0
Spirosoma	0	16	0	0	0	0	0	0	0	0	0	0	0	215	0	0	0	0	0	0	0	0	0	0	0	0	0	0	0
Crocinitomix	0	0	0	3	10	0	0	0	0	2	0	0	0	2	0	0	17	0	0	0	0	0	0	0	0	0	0	0	0
Olleya	0	0	0	0	7	0	0	0	0	0	0	0	0	14	0	0	0	0	0	0	0	0	0	0	0	0	0	0	0
Subsaxibacter	0	0	0	14	0	0	0	0	0	0	0	0	0	3	0	0	0	0	0	38	0	0	0	0	0	0	0	0	0
Schleiferia	0	13	0	0	12	0	0	0	0	0	0	0	0	15	0	0	0	0	0	0	0	0	0	0	0	0	0	0	0
Rubricoccus	0	12	0	0	0	0	0	0	0	0	0	0	0	3	0	0	0	0	0	0	0	0	0	0	0	0	0	0	0
Sporomusa	0	0	0	0	8	0	0	0	0	0	0	0	0	35	0	0	0	0	0	0	0	0	0	0	0	0	0	0	0
Blfdi19	0	0	0	0	4	0	0	0	0	0	0	0	0	3	0	0	0	0	0	36	0	0	0	0	0	0	0	0	0
Nannocystis	0	0	0	0	0	0	0	0	0	0	0	0	0	10	0	0	0	0	0	0	0	0	0	0	0	0	0	0	0
SM1A02	0	0	0	0	0	0	0	0	0	0	0	0	0	4	0	0	0	0	78	0	6	0	0	0	0	0	0	0	0
Planctomicrobium	0	0	0	0	0	0	0	0	0	0	0	0	0	33	0	0	0	0	0	0	0	0	0	0	0	0	0	0	0
Caulobacter	0	0	0	0	0	0	0	0	0	0	0	0	0	12	0	0	0	0	0	0	0	0	0	0	0	0	0	0	0
Mf105b01	0	3	0	0	0	3	0	0	0	0	0	0	0	5	0	0	0	0	0	87	0	0	0	0	0	0	0	0	0
Oleiphilus	0	0	0	0	4	28	0	0	0	0	0	0	6	8	0	0	0	0	0	186	0	0	0	0	0	0	0	0	0
Lentisphaera	0	0	0	2	0	0	0	0	0	0	0	0	0	2	0	0	0	0	53	0	0	0	0	0	0	0	0	0	0
Winogradskyella	0	0	0	4	17	10	0	0	0	0	0	0	0	0	0	0	35	0	0	0	0	0	0	0	0	0	0	0	0
Exiguobacterium	0	0	0	0	0	0	0	0	0	0	0	0	0	0	0	0	11	0	0	0	0	0	0	0	0	0	0	0	0
Dolosigranulum	0	0	0	0	0	23	0	0	0	0	0	0	0	0	0	0	4	0	0	0	0	0	0	0	0	0	0	0	0
Rhodopirellula	0	0	0	0	0	0	0	0	0	10	0	0	0	0	0	0	18	0	0	170	0	0	0	0	0	0	0	0	0
Terasakiella	0	0	0	0	0	0	0	0	0	0	0	0	0	0	0	0	6	36	0	0	0	0	0	0	0	0	0	0	0
67-14	0	0	0	0	0	35	0	0	0	0	0	0	0	0	0	0	0	171	0	0	0	0	0	0	0	0	0	0	0
Muribaculaceae	0	0	0	0	0	0	0	0	0	0	0	0	0	0	0	0	0	260	0	0	0	0	0	0	0	0	0	0	0
Candidatus_Peribacteria	0	0	0	0	0	0	0	0	0	0	0	0	0	0	0	0	0	106	0	0	0	0	0	0	0	0	0	0	0
Planctopirus	0	0	0	0	0	0	0	0	0	0	0	0	0	0	0	0	0	12	0	0	0	0	0	0	0	0	0	0	0
Legionella	0	91	0	10	0	4	0	0	0	0	0	0	0	0	0	0	0	51	0	104	0	0	0	0	0	0	0	0	0
Unknown Vibrionaceae	0	0	0	0	0	0	0	0	0	0	0	0	73	0	0	0	0	15	0	0	0	0	0	0	0	0	0	0	0
Variovorax	0	0	0	0	0	0	0	0	0	0	38	0	0	0	0	0	0	0	0	0	0	0	0	0	0	0	0	0	0
Dermacoccus	0	0	0	0	0	0	0	40	0	0	0	0	0	0	0	0	0	0	0	0	0	0	0	0	0	0	0	0	0
Microbacterium	0	0	0	0	0	0	8	8	0	0	0	0	0	0	0	0	0	0	0	0	0	0	0	0	0	0	0	0	0
Micromonospora	0	0	0	0	0	0	0	18	0	0	0	0	0	0	0	0	0	0	0	0	0	0	0	0	0	0	0	0	0
KD4-96	0	0	0	0	0	0	0	27	0	0	0	0	0	0	0	0	0	0	0	0	0	0	0	0	0	0	0	0	0
Roseomonas	0	0	0	0	0	0	0	13	0	0	0	0	0	0	0	0	0	0	0	0	0	0	0	0	0	0	0	0	0
Chelatococcus	0	0	0	0	0	0	0	50	0	0	0	0	0	0	0	0	0	0	0	0	0	0	0	0	0	0	0	0	0
Microvirga	0	0	0	0	0	0	0	40	0	0	0	0	0	0	0	0	0	0	0	0	0	0	0	0	0	0	0	0	0
Sphaerotilus	0	0	0	0	0	0	0	26	0	0	0	0	0	0	0	0	0	0	0	0	0	0	0	0	0	0	0	0	0
Aureispira	0	0	0	0	14	0	0	0	0	0	0	0	0	0	0	0	0	0	0	0	0	0	0	0	0	0	0	0	0
Moorella	0	0	0	0	10	0	0	0	0	0	0	0	0	0	0	0	0	0	0	0	0	0	0	0	0	0	0	0	0
Kytococcus	0	13	0	0	0	0	0	0	0	0	0	0	0	0	0	0	0	0	0	0	0	0	0	0	0	0	0	0	0
Actinomycetospora	0	10	0	0	0	0	0	0	0	0	0	0	0	0	0	0	0	0	0	0	0	0	0	0	0	0	0	0	0
Streptomyces	0	24	0	0	0	0	0	0	0	0	0	0	0	0	0	0	0	0	0	183	0	0	0	3	0	0	0	0	0
Patulibacter	0	16	0	0	0	0	0	0	0	0	0	0	0	0	0	0	0	0	0	0	0	0	0	0	0	0	0	0	0
Rubrivirga	0	15	0	0	0	0	0	0	0	0	0	0	0	0	0	0	0	0	0	0	0	0	0	0	0	0	0	0	0
Sulfurimonas	0	29	0	0	0	0	0	0	0	0	0	0	0	0	0	0	0	0	0	0	0	0	0	0	0	0	0	0	0
AKYG1722	0	31	0	0	0	0	0	0	0	0	0	0	0	0	0	0	0	0	0	0	0	0	0	0	0	0	0	0	0
Dadabacteriales	0	18	0	0	0	0	0	0	0	0	0	0	0	0	0	0	0	0	0	0	0	0	0	0	0	0	0	0	0
Aeribacillus	0	11	0	0	0	0	0	0	0	0	0	0	0	0	0	0	0	0	0	0	0	0	0	0	0	0	0	0	0
Kurthia	0	1	0	0	0	9	0	0	0	38	0	0	0	0	0	0	0	0	0	0	0	0	4	2	0	0	0	0	0
Anaerobacterium	0	13	0	0	0	0	0	0	0	0	0	0	0	0	0	0	0	0	0	0	0	0	0	0	0	0	0	0	0
Clostridium_sensu_stricto_13	0	8	0	0	0	0	0	0	0	0	0	0	0	0	0	0	0	0	0	0	2	0	0	0	0	0	0	0	0
Clostridium_sensu_stricto_14	0	13	0	0	0	0	0	0	0	0	0	0	0	0	0	0	0	0	0	0	0	0	0	0	0	0	0	0	0
Clostridium_sensu_stricto_3	0	10	0	0	0	0	0	0	0	0	0	0	0	0	0	0	0	0	0	0	0	0	2	0	0	0	0	0	0
[Eubacterium]_brachy_group	0	10	0	0	0	0	0	0	0	0	0	0	0	0	0	0	0	0	0	0	0	0	0	0	0	0	0	0	0
Anaerococcus	0	10	0	0	0	0	0	0	0	0	0	0	0	0	0	0	0	0	0	0	0	0	0	0	0	0	0	0	0
Gallicola	0	18	0	0	0	0	0	0	0	0	0	0	0	0	0	0	0	0	0	42	0	0	0	0	0	0	0	0	0
Symbiobacterium	0	23	0	0	0	12	48	0	0	0	0	0	0	0	0	0	0	0	0	0	0	0	0	0	0	0	0	0	0
Eel-36e1D6	0	26	0	0	0	0	3	0	0	0	0	0	0	0	0	0	0	0	0	0	0	0	0	0	0	0	0	0	0
Mesorhizobium	0	43	0	0	0	0	0	0	0	10	0	0	0	0	0	0	0	0	0	0	0	0	0	0	0	0	0	0	0
Polycyclovorans	0	6	0	0	0	0	0	0	0	0	0	0	0	0	0	0	0	0	0	27	0	0	2	0	0	0	0	0	0
Pseudonocardia	0	0	0	0	0	0	0	0	0	0	0	0	0	0	0	0	0	0	74	102	0	0	0	0	0	0	0	0	0
Solirubrobacter	0	0	0	0	0	0	0	0	0	0	0	0	0	0	0	0	0	0	36	0	0	0	0	0	0	0	0	0	0
Porphyromonas	0	0	0	0	0	0	0	0	0	0	0	0	0	0	0	0	0	0	133	0	0	0	0	0	0	0	0	0	0
Capnocytophaga	0	0	0	0	0	0	0	0	0	0	0	0	0	0	0	0	0	0	124	0	0	0	0	0	0	0	0	0	0
Granulicatella	0	0	0	0	0	0	4	0	0	0	0	0	0	0	0	0	0	0	196	0	0	0	0	0	0	0	0	0	0
Parvimonas	0	0	0	0	0	0	0	0	0	0	0	0	0	0	0	0	0	0	108	0	0	0	0	0	0	0	0	0	0
Unknown Saccharimonadaceae	0	0	0	0	0	0	0	0	0	0	0	0	0	0	0	0	0	0	18	0	0	0	0	0	0	0	0	0	0
Unknown Acetobacteraceae	0	0	0	0	0	0	0	0	0	0	0	0	0	0	0	0	0	0	48	0	0	0	0	0	0	0	0	0	0
Craurococcus-Caldovatus	0	0	0	0	0	0	0	0	0	0	0	0	0	0	0	0	0	0	3160	0	0	0	0	0	0	0	0	0	0
Rubritepida	0	0	0	0	0	0	0	0	0	0	0	0	0	0	0	0	0	0	73	0	0	0	0	0	0	0	0	0	0
Burkholderia-Caballeronia-Paraburkholderia	0	0	0	0	0	0	0	0	0	0	0	0	0	0	0	0	0	0	25	0	0	0	0	0	0	0	0	0	0
Actinobacillus	0	0	0	0	0	0	0	0	0	0	0	0	0	0	0	0	0	0	50	0	0	0	0	0	0	0	0	0	0
Haemophilus	0	0	0	0	0	0	0	0	0	0	0	0	0	0	0	0	0	0	48	0	0	0	0	0	0	0	0	0	0
Unknown Acidobacteriaceae_(Subgroup_1)	0	0	0	0	0	0	0	0	0	0	0	0	10	0	0	0	0	0	0	0	0	0	0	0	0	0	0	0	0
Algibacter	0	0	0	0	0	0	0	0	0	0	0	0	12	0	0	0	0	0	0	0	0	0	0	0	0	0	0	0	0
Tamlana	0	0	0	0	0	0	0	0	0	69	0	0	15	0	0	0	0	0	0	0	0	0	0	0	0	0	0	0	0
Kapabacteriales	0	0	0	0	0	0	0	0	0	0	0	0	39	0	0	0	0	0	0	0	0	0	0	0	0	0	0	0	0
Peredibacter	0	0	0	0	0	0	0	0	0	0	0	0	0	0	0	0	0	0	0	8	2	0	0	0	0	0	0	0	0
Nitratireductor	0	0	0	0	0	0	0	0	0	0	0	0	0	0	0	0	0	0	0	0	10	0	0	0	0	0	0	0	0
Rheinheimera	0	0	0	0	0	41	0	0	0	0	0	0	0	0	0	0	0	0	0	70	2	0	0	0	0	0	0	0	0
Brochothrix	0	0	0	0	0	0	14	0	0	0	0	0	0	0	0	0	0	0	0	0	0	0	79	0	0	0	0	0	0
Zhongshania	0	0	0	0	0	0	0	0	0	42	0	0	0	0	0	0	0	0	0	0	0	0	2	0	0	0	0	0	0
Peptococcus	0	0	0	2	0	12	0	0	0	0	0	0	0	0	0	0	0	0	0	0	0	0	0	0	0	0	0	0	0
Rummeliibacillus	0	0	0	0	0	0	11	0	0	0	0	0	0	0	0	0	0	0	0	0	0	0	0	0	0	0	0	0	0
Unknown Erysipelotrichaceae	0	0	0	0	0	0	12	0	0	0	0	0	0	0	0	0	0	0	0	0	0	0	0	0	0	0	0	0	0
Xylanibacillus	0	0	0	0	0	0	15	0	0	0	0	0	0	0	0	0	0	0	0	0	0	0	0	0	0	0	0	0	0
Caldanaerobius	0	0	0	0	0	0	152	0	0	0	0	0	0	0	0	0	0	0	0	0	0	0	0	0	0	0	0	0	0
Albirhodobacter	0	0	0	0	0	0	301	0	0	0	0	0	0	0	0	0	0	0	0	0	0	0	0	0	0	0	0	0	0
Candidatus_Nitrosopumilus	0	0	0	0	0	20	0	0	0	0	0	0	0	0	0	0	0	0	0	0	0	0	0	0	0	0	0	0	0
Sva0996_marine_group	0	0	0	0	0	10	0	0	0	107	0	0	0	0	0	0	0	0	0	0	0	0	0	0	0	0	0	0	0
Roseivirga	0	0	0	0	0	10	0	0	0	0	0	0	0	0	0	0	0	0	0	0	0	0	0	0	0	0	0	0	0
Gitt-GS-136	0	0	0	0	0	28	0	0	0	0	0	0	0	0	0	0	0	0	0	0	0	0	0	0	0	0	0	0	0
Deinococcus	0	0	0	0	0	39	0	0	0	0	0	0	0	0	0	0	0	0	0	0	0	0	0	0	0	0	0	0	0
Paramaledivibacter	0	0	0	0	0	23	0	0	0	0	0	0	0	0	0	0	0	0	0	0	0	0	0	0	0	0	0	0	0
Moraxella	0	0	0	0	0	260	0	0	0	0	0	0	0	0	0	0	0	0	0	0	0	0	0	0	0	0	0	0	0
Enterovibrio	0	0	0	0	0	15	0	0	0	0	0	0	0	0	0	0	0	0	0	0	0	0	0	0	0	0	0	0	0
Lysobacter	0	0	0	0	0	43	0	0	0	0	0	0	0	0	0	0	0	0	0	0	0	0	0	0	0	0	0	0	0
Victivallaceae	0	0	0	0	0	10	0	0	0	0	0	0	0	0	0	0	0	0	0	0	0	0	0	0	0	0	0	0	0
Nitriliruptoraceae	0	0	0	0	0	0	0	0	0	30	0	0	0	0	0	0	0	0	0	0	0	0	0	0	0	0	0	0	0
Owenweeksia	0	0	0	0	0	0	0	0	0	20	0	0	0	0	0	0	0	0	0	0	0	0	0	0	0	0	0	0	0
Lineage_IV	0	0	0	0	0	0	0	0	0	31	0	0	0	0	0	0	0	0	0	0	0	0	0	0	0	0	0	0	0
Skermanella	0	0	0	0	0	0	0	0	0	79	0	0	0	0	0	0	0	0	0	0	0	0	0	0	0	0	0	0	0
Unknown Beijerinckiaceae	0	0	0	0	0	0	0	0	0	306	0	0	0	0	0	0	0	0	0	0	0	0	0	0	0	0	0	0	0
Rubellimicrobium	0	0	0	0	0	0	0	0	0	13	0	0	0	0	0	0	0	0	0	0	0	0	0	0	0	0	0	0	0
Porphyrobacter	0	0	0	0	0	0	0	0	0	33	0	0	0	0	0	0	0	0	0	0	0	0	0	0	0	0	0	0	0
Ga0077536	0	0	0	0	0	0	0	0	0	87	0	0	0	0	0	0	0	0	0	0	0	0	0	0	0	0	0	0	0
Marinicella	0	0	0	0	0	0	0	0	0	100	0	0	0	0	0	0	0	0	0	0	0	0	0	0	0	0	0	0	0
Alloprevotella	0	0	0	0	0	0	0	0	0	0	0	0	0	0	0	0	0	0	0	17	0	0	0	0	0	0	0	0	0
Balneolaceae	0	0	0	0	0	0	0	0	0	0	0	0	0	0	0	0	0	0	0	137	0	0	0	0	0	0	0	0	0
0319-6G20	0	0	0	0	0	0	0	0	0	0	0	0	0	0	0	0	0	0	0	11	0	0	0	0	0	0	0	0	0
Syntrophaceticus	0	0	0	0	0	0	0	0	0	0	0	0	0	0	0	0	0	0	0	129	0	0	0	0	0	0	0	0	0
Aureimonas	0	0	0	0	0	0	0	0	0	0	0	0	0	0	0	0	0	0	0	40	0	0	0	0	0	0	0	0	0
Ralstonia	0	0	0	0	0	0	0	0	0	0	0	0	0	0	0	0	0	0	0	92	0	0	0	0	0	0	0	0	0
EC3	0	0	0	0	0	0	0	0	0	0	0	0	0	0	0	0	0	0	0	18	0	0	0	0	0	0	0	0	0
Pelagicoccus	0	0	0	0	0	0	0	0	0	0	0	0	0	0	0	0	0	0	0	80	0	0	0	0	0	0	0	0	0
